# Supplementary material for: Experimental Insight on the Impact of VoNR and VoLTE Calls on the Smartphone Battery Performance during Mobility in 5G SA Network
Source: Research Square preprint supplement (doi:10.21203/rs.3.rs-7754087/v1), 2025-10-01
Supplement: Supplementary file 1 [file b6656ac88b9d13da4f50e90e.pdf]

# Supplementary File for Detailed Observation

## (1) Qualcomm Chipset - Detailed observation of the drive testing results

| Qualcomm Devices |                               |                                  |                   |                        |                          |                   |                        |
|------------------|-------------------------------|----------------------------------|-------------------|------------------------|--------------------------|-------------------|------------------------|
| Iteration        | DUT-1 : VoNR ON               |                                  |                   |                        | DUT-2 : VoNR OFF (VoLTE) |                   |                        |
|                  | Call Duration<br>(in Minutes) | EPSFB details                    | 'Serving Cell ID' | Battery Percentage     | MINUTES                  | 'Serving Cell ID' | Battery Percentage     |
|                  |                               |                                  | Change count      | (after call completed) |                          | Change count      | (after call completed) |
|                  | -                             | -                                | -                 | 100%                   | -                        | -                 | 100%                   |
| 1                | 11                            | Fallback to VoLTE after 8 minute | 54                | 95%                    | 10                       | 47                | 96%                    |
| 2                | 11                            | No Fallback to VoLTE             | 57                | 92%                    | 10                       | 39                | 93%                    |
| 3                | 9                             | Fallback to VoLTE after 6 minute | 61                | 89%                    | 10                       | 52                | 91%                    |
| 4                | 9                             | Fallback to VoLTE after 7 minute | 61                | 87%                    | 10                       | 35                | 89%                    |
| 5                | 8                             | Fallback to VoLTE after 5 minute | 79                | 85%                    | 10                       | 97                | 86%                    |
| 6                | 11                            | No Fallback to VoLTE             | 89                | 82%                    | 10                       | 64                | 83%                    |
| 7                | 11                            | No Fallback to VoLTE             | 58                | 79%                    | 9                        | 38                | 80%                    |
| 8                | 10                            | No Fallback to VoLTE             | 15                | 74%                    | 10                       | 55                | 76%                    |
| 9                | 7                             | Fallback to VoLTE after 7 minute | 39                | 72%                    | 9                        | 76                | 74%                    |
| 10               | 5                             | Fallback to VoLTE after 3 minute | 29                | 71%                    | 10                       | 83                | 71%                    |
| 11               | 8                             | Fallback to VoLTE after 6 minute | 30                | 68%                    | 10                       | 87                | 69%                    |
| 12               | 5                             | Fallback to VoLTE after 3 minute | 23                | 65%                    | 10                       | 166               | 67%                    |
| 13               | 5                             | Fallback to VoLTE after 4 minute | 23                | 63%                    |                          |                   | 66%                    |

## (2) Exynos Chipset - Detailed observation of the drive testing results

| Exynos Devices |                 |                                  |                   |                        |                          |                   |                        |
|----------------|-----------------|----------------------------------|-------------------|------------------------|--------------------------|-------------------|------------------------|
| Iteration      | DUT-3 : VoNR ON |                                  |                   |                        | DUT-4 : VoNR OFF (VoLTE) |                   |                        |
|                | MINUTES         | EPSFB details                    | 'Serving Cell ID' | Battery Percentage     | MINUTES                  | 'Serving Cell ID' | Battery Percentage     |
|                |                 |                                  | Change count      | (after call completed) |                          | Change count      | (after call completed) |
|                | -               | -                                | -                 | 100%                   | -                        | -                 | 100%                   |
| 1              | 2               | Fallback to VoLTE after 1 minute | 7                 | 94%                    | 10                       | 88                | 93%                    |
| 2              | 1               | Fallback to VoLTE after 1 minute | 3                 | 93%                    | 10                       | 37                | 91%                    |
| 3              | 4               | Fallback to VoLTE after 2 minute | 24                | 91%                    | 10                       | 76                | 86%                    |
| 4              | 5               | Fallback to VoLTE after 3 minute | 5                 | 89%                    | 10                       | 93                | 83%                    |
| 5              | 8               | Fallback to VoLTE after 8 minute | 59                | 86%                    | 10                       | 99                | 81%                    |
| 6              | 6               | Fallback to VoLTE after 3 minute | 24                | 84%                    | 10                       | 21                | 78%                    |
| 7              | 5               | Fallback to VoLTE after 2 minute | 47                | 83%                    | 10                       | 46                | 75%                    |
| 8              | 5               | Fallback to VoLTE after 1 minute | 35                | 81%                    | 10                       | 70                | 72%                    |
| 9              | 9               | Fallback to VoLTE after 7 minute | 38                | 78%                    | 10                       | 7                 | 65%                    |
| 10             | 6               | Fallback to VoLTE after 2 minute | 43                | 76%                    | 10                       | 47                | 62%                    |
| 11             | 5               | Fallback to VoLTE after 1 minute | 31                | 75%                    | 10                       | 66                | 60%                    |
| 12             | 6               | Fallback to VoLTE after 3 minute | 35                | 73%                    |                          |                   |                        |
| 13             | 5               | Fallback to VoLTE after 1 minute | 36                | 67%                    |                          |                   |                        |
| 14             | 10              | No Fallback to VoLTE             | 68                | 64%                    |                          |                   |                        |
| 15             | 5               | Fallback to VoLTE after 3 minute | 32                | 62%                    |                          |                   |                        |
| 16             | 8               | Fallback to VoLTE after 5 minute | 36                | 60%                    |                          |                   |                        |
| 17             | 6               | Fallback to VoLTE after 1 minute | 22                | 57%                    |                          |                   |                        |

### (3) MediaTek Chipset - Detailed observation of the drive testing results

| MediaTek Devices |                 |                                    |                   |                        |                          |                   |                        |
|------------------|-----------------|------------------------------------|-------------------|------------------------|--------------------------|-------------------|------------------------|
| Iteration        | DUT-5 : VoNR ON |                                    |                   |                        | DUT-6 : VoNR OFF (VoLTE) |                   |                        |
|                  | MINUTES         | EPSFB details                      | 'Serving Cell ID' | Battery Percentage     | MINUTES                  | 'Serving Cell ID' | Battery Percentage     |
|                  |                 |                                    | Change count      | (after call completed) |                          | Change count      | (after call completed) |
|                  | -               | -                                  | -                 | 100%                   | -                        | -                 | 100%                   |
| 1                | 10              | Fallback to VoLTE after 0.5 minute | 34                | 92%                    | 10                       | 37                | 97%                    |
| 2                | 7               | Fallback to VoLTE after 3 minute   | 35                | 89%                    | 7                        | 28                | 95%                    |
| 3                | 1               | Fallback to VoLTE after 1 minute   | 7                 | 84%                    | 1                        | 9                 | 93%                    |
| 4                | 11              | No Fallback to VoLTE               | 37                | 83%                    | 11                       | 65                | 92%                    |
| 5                | 4               | Fallback to VoLTE after 2 minute   | 23                | 81%                    | 4                        | 28                | 91%                    |
| 6                | 9               | Call Drop after 7 minute           | 64                | 80%                    | 9                        | 97                | 89%                    |
| 7                | 6               | Fallback to VoLTE after 0.5minute  | 14                | 79%                    | 6                        | 15                | 87%                    |
| 8                | 7               | Call Drop after 4 minutes          | 17                | 79%                    | 7                        | 36                | 86%                    |
| 9                | 10              | No Fallback to VoLTE               | 60                | 77%                    | 10                       | 90                | 84%                    |
| 10               | 4               | At 13:00:45 Fallback to LTE        | 48                | 75%                    | 4                        | 35                | 83%                    |
| 11               | 5               | Call Drop MT side                  | 21                | 73%                    | 5                        | 49                | 82%                    |
| 12               | 3               | Fallback to VoLTE after 1 minute   | 30                | 69%                    | 3                        | 35                | 77%                    |
| 13               | 11              | No Fallback to VoLTE               | 55                | 67%                    | 11                       | 50                | 76%                    |
| 14               | 2               | Fallback to VoLTE after 0.5 minute | 37                | 66%                    | 2                        | 33                | 75%                    |
| 15               | 10              | Fallback to VoLTE after 9 minute   | 51                | 64%                    | 10                       | 67                | 75%                    |
| 16               | 9               | Call Drop at MT                    | 64                | 61%                    | 9                        | 115               | 73%                    |
| 17               | 6               | Fallback to VoLTE after 1 minute   | 44                | 59%                    | 6                        | No Screenshot     | 72%                    |
| 18               | 3               | Fallback to VoLTE after 1 minute   | 15                | 59%                    | 3                        | 15                | 72%                    |
